# Supplementary material for: Modeling and analysis of site-specific mutations in cancer identifies known plus putative novel hotspots and bias due to contextual sequences
Source: PubMed Central journal article supplement — Comput Struct Biotechnol J. 2020 Jun 20;18:1664–75. doi: 10.1016/j.csbj.2020.06.022 (PMC7339035; doi:10.1016/j.csbj.2020.06.022), 2020-06-20

**A** Differences in  $\alpha$  parameter before and after fitting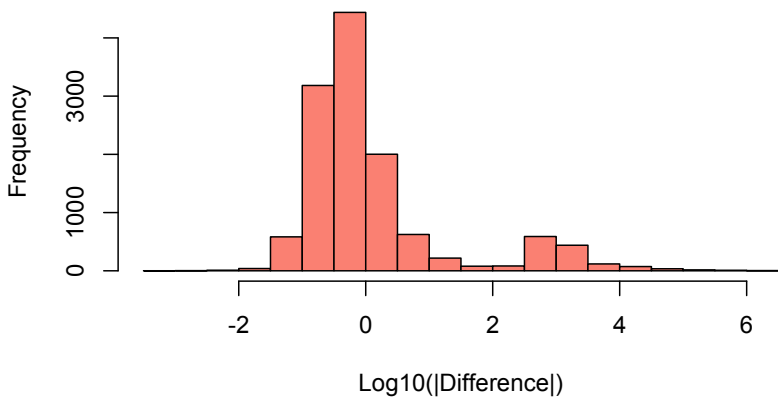**B** Differences in  $\beta$  parameter before and after fitting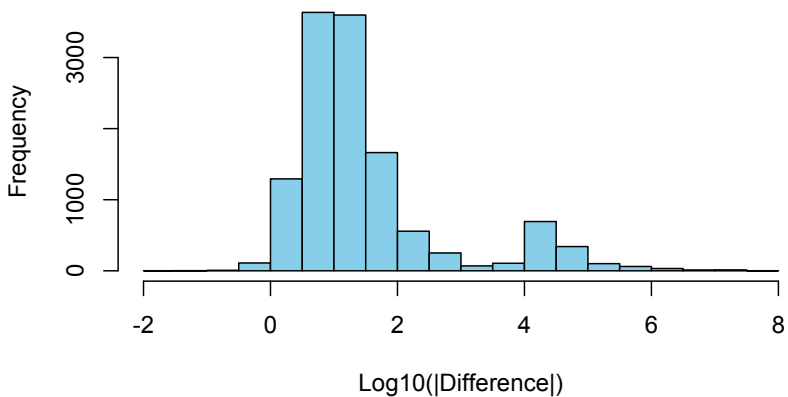**C** Iterations needed to converge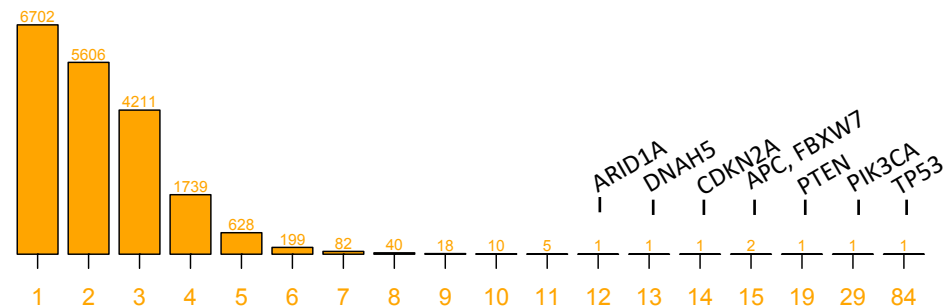**D** Iterations needed to converge (in fractions of maximum number of mutations)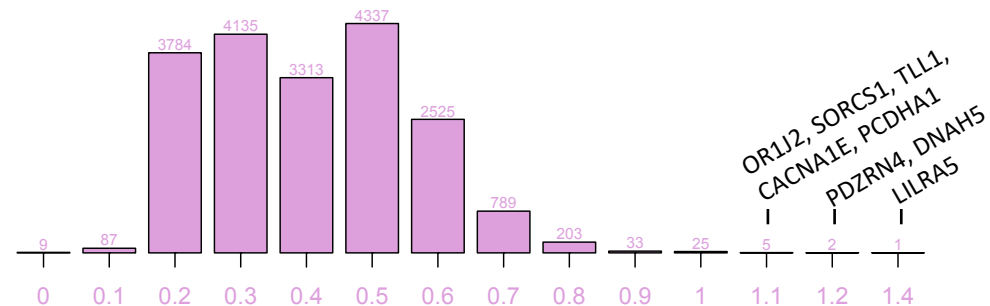

Supplement: mmc3.pdf [file mmc3.pdf]
