# Supplementary material for: Modeling and analysis of site-specific mutations in cancer identifies known plus putative novel hotspots and bias due to contextual sequences
Source: PubMed Central journal article supplement — Comput Struct Biotechnol J. 2020 Jun 20;18:1664–75. doi: 10.1016/j.csbj.2020.06.022 (PMC7339035; doi:10.1016/j.csbj.2020.06.022), 2020-06-20

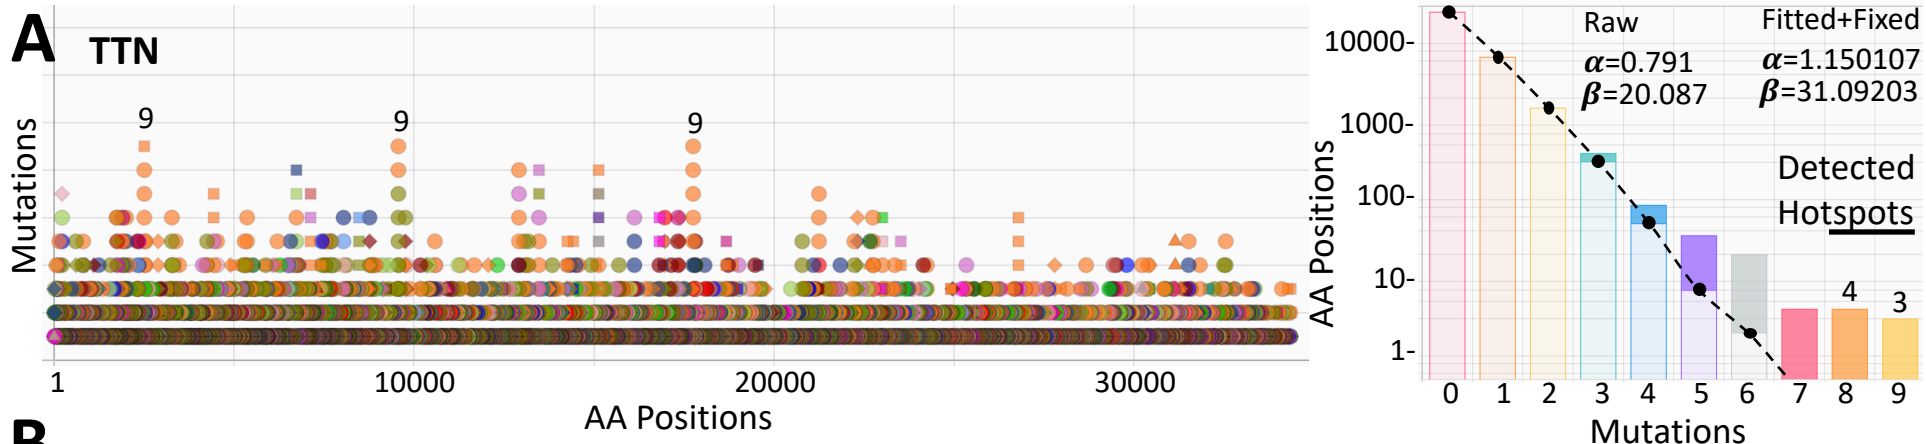

**B**

**8 Mutations**

| AA Pos | Whole Gene |               | Window (w) |       | $\alpha$ | $\beta$ |
|--------|------------|---------------|------------|-------|----------|---------|
|        | p          | p             |            |       |          |         |
| 6731   | 1.6e-7     | 1.1e-6        | (7)        | 0.854 | 15.653   |         |
| 12911  | 1.6e-7     | <b>2.3e-9</b> | (13)       | 2.312 | 57.870   |         |
| 13467  | 1.6e-7     | <b>6.5e-9</b> | (14)       | 1.754 | 44.086   |         |
| 15125  | 1.6e-7     | <b>2.1e-8</b> | (16)       | 1.151 | 31.397   |         |

**9 Mutations**

| AA Pos | Whole Gene |                | Windows (w) |       | $\alpha$ | $\beta$ |
|--------|------------|----------------|-------------|-------|----------|---------|
|        | p          | p              |             |       |          |         |
| 2506   | 5.2e-9     | <b>2.5e-9</b>  | (3)         | 1.556 | 38.167   |         |
| 9563   | 5.2e-9     | <b>7.6e-10</b> | (10)        | 1.611 | 45.031   |         |
| 17750  | 5.2e-9     | 3.9e-8         | (17)        | 0.738 | 20.618   |         |

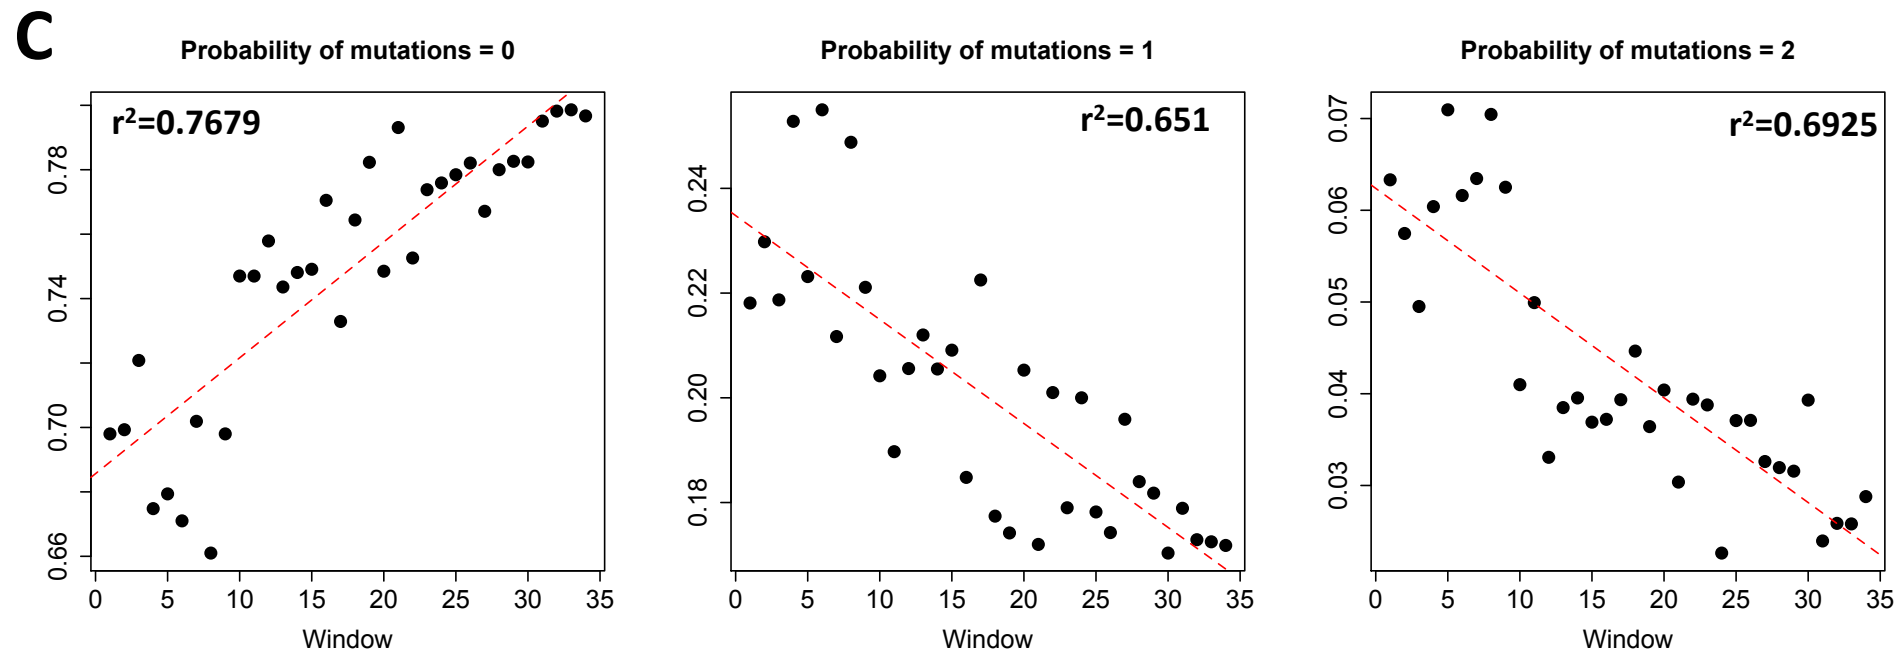

Supplement: mmc5.pdf [file mmc5.pdf]
