# Supplementary material for: Modeling and analysis of site-specific mutations in cancer identifies known plus putative novel hotspots and bias due to contextual sequences
Source: PubMed Central journal article supplement — Comput Struct Biotechnol J. 2020 Jun 20;18:1664–75. doi: 10.1016/j.csbj.2020.06.022 (PMC7339035; doi:10.1016/j.csbj.2020.06.022), 2020-06-20
Supplement: mmc6.pdf [file mmc6.pdf]

## % All Mutated Positions

## % Hotspots (nMut >= 10)

## % Hotspots (nMut 5 ~ 9)

| (N in k) | 1.7  | 17   | 59   | 23   | 221  | .4   | 125  | 497        |     | 565  | 1444 | 116 | 61  | 7   | 29   | 2   | 6   | 37   | 36         | (N)  | 143  | 750  | 171  | 742  | 29   | 7  | 2  | 20  | 327  | 59         |      | 578  | 1701 | 339  | 316  | 17   | 17   | 13  | 151  | 69 | 2 |
|----------|------|------|------|------|------|------|------|------------|-----|------|------|-----|-----|-----|------|-----|-----|------|------------|------|------|------|------|------|------|----|----|-----|------|------------|------|------|------|------|------|------|------|-----|------|----|---|
| 3.6      | 2.2  | 2.3  | 5.1  | 6.2  | 2.9  | 3.8  | 2.7  | <i>TTT</i> | 0.9 | 2.5  | 0.9  | 0.5 | 2.9 | 1.5 | 0    | 5.2 | 2.6 | 0.3  | <i>TTT</i> | 2.1  | 2.7  | 2.3  | 0    | 6.9  | 0    | 0  | 0  | 0.3 | 0    | <i>TTT</i> | 0.3  | 1.6  | 0.3  | 0    | 0    | 5.9  | 7.7  | 1.3 | 0    | 0  |   |
| 1.8      | 1.1  | 1.1  | 1.6  | 1.6  | 0.8  | 1.4  | 1.3  | <i>TTG</i> | 1.2 | 0.9  | 1.6  | 6   | 2.8 | 1.1 | 0    | 3.8 | 2.5 | 0.2  | <i>TTG</i> | 0.7  | 1.3  | 0.6  | 9.3  | 3.4  | 0    | 0  | 5  | 0.9 | 0    | <i>TTG</i> | 0.2  | 0.6  | 0.3  | 5.7  | 0    | 0    | 0    | 0   | 1.4  | 0  |   |
| 2.7      | 1.4  | 1.6  | 1.7  | 2.1  | 1.6  | 1.8  | 1.7  | <i>TTC</i> | 0.8 | 1.4  | 1.1  | 7   | 2.7 | 1.1 | 0    | 3.8 | 2.8 | 0.2  | <i>TTC</i> | 4.9  | 3.6  | 0    | 8.4  | 6.9  | 0    | 0  | 0  | 0.9 | 0    | <i>TTC</i> | 2.8  | 1.7  | 0.3  | 10.4 | 5.9  | 0    | 7.7  | 2   | 0    | 0  |   |
| 7.6      | 1    | 0.9  | 2.1  | 2.8  | 0.5  | 1.8  | 1    | <i>TTA</i> | 0.8 | 0.6  | 1.7  | 4.5 | 2.1 | 5   | 0    | 2.6 | 2.3 | 0.2  | <i>TTA</i> | 1.4  | 0.8  | 4.1  | 9.2  | 6.9  | 0    | 0  | 0  | 3.1 | 0    | <i>TTA</i> | 0.3  | 0.5  | 0.9  | 5.4  | 5.9  | 0    | 0    | 2.6 | 0    | 0  |   |
| 5.8      | 10.8 | 10.4 | 12.3 | 13.2 | 11.2 | 11.9 | 11.5 | <i>TCT</i> | 7.9 | 10.3 | 15.4 | 1.7 | 6.5 | 4.6 | 0    | 4   | 6.7 | 16.7 | <i>TCT</i> | 0    | 4.9  | 2.9  | 0.4  | 3.4  | 0    | 0  | 15 | 8   | 5.1  | <i>TCT</i> | 3.5  | 5.3  | 7.7  | 0.6  | 5.9  | 0    | 7.7  | 6.6 | 13   | 0  |   |
| 0        | 5.6  | 5.9  | 4.5  | 3.6  | 3.7  | 3.7  | 5    | <i>TCG</i> | 7.2 | 6.4  | 9    | 0.8 | 1.5 | 3.5 | 0    | 0.9 | 1.2 | 0    | <i>TCG</i> | 23.8 | 19.5 | 40.9 | 0.9  | 6.9  | 0    | 0  | 0  | 3.4 | 0    | <i>TCG</i> | 27.3 | 27.1 | 37.2 | 1.9  | 5.9  | 5.9  | 7.7  | 1.3 | 0    | 0  |   |
| 0        | 7.7  | 7.8  | 5.5  | 5.3  | 9    | 6.9  | 7.6  | <i>TCC</i> | 7.2 | 7.7  | 7.5  | 7   | 3.4 | 5.4 | 0    | 3.4 | 3.7 | 0.2  | <i>TCC</i> | 12.6 | 6.8  | 4.7  | 6.6  | 0    | 0    | 0  | 5  | 2.1 | 0    | <i>TCC</i> | 7.6  | 7.2  | 2.9  | 5.7  | 0    | 17.6 | 0    | 6.6 | 2.9  | 0  |   |
| 25.3     | 6.2  | 5.8  | 6.1  | 6    | 6.6  | 6.5  | 7.3  | <i>TCA</i> | 8.6 | 5.8  | 19   | 1.8 | 4.5 | 17  | 23.6 | 3.9 | 5.2 | 0.2  | <i>TCA</i> | 2.8  | 1.9  | 4.7  | 0.3  | 6.9  | 14.3 | 0  | 5  | 3.4 | 3.4  | <i>TCA</i> | 2.8  | 2    | 7.1  | 0.6  | 17.6 | 0    | 7.7  | 6   | 0    | 0  |   |
| 0.8      | 1.6  | 1.4  | 2.1  | 2.4  | 1.3  | 1.9  | 1.7  | <i>GTT</i> | 1.2 | 1.6  | 0.2  | 4.5 | 1.8 | 1.4 | 0    | 2.7 | 1.7 | 0.7  | <i>GTT</i> | 3.5  | 0.7  | 0    | 5    | 0    | 14.3 | 0  | 0  | 1.2 | 0    | <i>GTT</i> | 0.5  | 0.5  | 0    | 7.6  | 5.9  | 0    | 0    | 1.3 | 0    | 0  |   |
| 3.3      | 1.7  | 1.4  | 1.5  | 1.5  | 1.9  | 1.7  | 1.6  | <i>GTG</i> | 1.4 | 1.5  | 0.4  | 1.1 | 2.4 | 1.3 | 0    | 3.3 | 3   | 4    | <i>GTG</i> | 0.7  | 1.3  | 0.6  | 0.3  | 0    | 0    | 0  | 10 | 5.5 | 3.4  | <i>GTG</i> | 0.3  | 0.6  | 0    | 0.6  | 5.9  | 0    | 0    | 4   | 4.3  | 0  |   |
| 4.6      | 1.4  | 1.4  | 1.3  | 1.2  | 1.6  | 1.4  | 1.4  | <i>GTC</i> | 0.7 | 1.6  | 0.2  | 1   | 2.5 | 0.9 | 0    | 2.1 | 2.3 | 0.5  | <i>GTC</i> | 2.8  | 1.7  | 0.6  | 0.4  | 0    | 0    | 0  | 5  | 4.9 | 6.8  | <i>GTC</i> | 1.2  | 0.8  | 0    | 0    | 0    | 0    | 0    | 0.7 | 0    | 0  |   |
| 4.2      | 1.1  | 0.9  | 1.4  | 1.6  | 1.3  | 1.3  | 1.2  | <i>GTA</i> | 0.8 | 1.3  | 0.2  | 0.8 | 1.3 | 2.1 | 0    | 1.9 | 1.8 | 10.1 | <i>GTA</i> | 0    | 1.5  | 0.6  | 0    | 0    | 0    | 0  | 0  | 3.1 | 8.5  | <i>GTA</i> | 0.3  | 0.2  | 0.3  | 0.6  | 5.9  | 0    | 7.7  | 2.6 | 15.9 | 0  |   |
| 1.8      | 4.3  | 4.3  | 3.9  | 3.6  | 4.8  | 4    | 4.2  | <i>GCT</i> | 4.1 | 3.9  | 0.9  | 1.5 | 3.7 | 2.4 | 0.1  | 3.9 | 4.2 | 4.3  | <i>GCT</i> | 2.8  | 0.7  | 0.6  | 0.3  | 0    | 0    | 0  | 5  | 4   | 5.1  | <i>GCT</i> | 1    | 0.7  | 0    | 0.6  | 0    | 0    | 0    | 0.7 | 0    | 0  |   |
| 0        | 6.4  | 7.1  | 4.8  | 3.8  | 3.7  | 4    | 4.7  | <i>GCG</i> | 7.1 | 6.5  | 4.6  | 0.7 | 1.4 | 3.1 | 0    | 1.3 | 1.7 | 0.1  | <i>GCG</i> | 7.7  | 4.9  | 7    | 1.1  | 13.8 | 0    | 0  | 5  | 3.1 | 0    | <i>GCG</i> | 15.9 | 14.5 | 10.3 | 0.6  | 0    | 5.9  | 0    | 6.6 | 0    | 0  |   |
| 0        | 5.1  | 5.5  | 4    | 3.5  | 4    | 4.4  | 4.1  | <i>GCC</i> | 3.2 | 4.8  | 1.9  | 8.5 | 3.3 | 2.6 | 0    | 3   | 2.5 | 0.4  | <i>GCC</i> | 4.2  | 4.1  | 2.9  | 5.9  | 0    | 0    | 0  | 10 | 2.1 | 0    | <i>GCC</i> | 2.1  | 2.6  | 0    | 8.9  | 5.9  | 0    | 7.7  | 4   | 0    | 0  |   |
| 0        | 2.8  | 2.7  | 2.6  | 2.5  | 1.1  | 2.7  | 2.8  | <i>GCA</i> | 3   | 2.5  | 4.6  | 1.5 | 3   | 3.8 | 5.2  | 2.9 | 4.5 | 0.3  | <i>GCA</i> | 2.1  | 1.3  | 1.2  | 0.1  | 0    | 0    | 0  | 10 | 2.8 | 1.7  | <i>GCA</i> | 0.7  | 0.9  | 0.6  | 0.6  | 0    | 0    | 0    | 5.3 | 0    | 0  |   |
| 2.7      | 2.1  | 2.1  | 2.7  | 2.9  | 3.2  | 2.5  | 2.5  | <i>CTT</i> | 1.6 | 2.2  | 0.4  | 7.4 | 3.7 | 1.7 | 0    | 4.5 | 2.6 | 1    | <i>CTT</i> | 0.7  | 2.8  | 0.6  | 12   | 0    | 0    | 0  | 0  | 0.6 | 0    | <i>CTT</i> | 1.9  | 1.8  | 0.6  | 10.8 | 0    | 5.9  | 0    | 0.7 | 0    | 0  |   |
| 6        | 2.3  | 2.4  | 1.9  | 1.8  | 2.7  | 2.2  | 2.4  | <i>CTG</i> | 2.8 | 2    | 0.5  | 2.5 | 5.9 | 2.8 | 0    | 5   | 4.8 | 8.8  | <i>CTG</i> | 0    | 2.1  | 0.6  | 0.3  | 0    | 0    | 0  | 0  | 8.6 | 13.6 | <i>CTG</i> | 0.3  | 1.1  | 0    | 0.3  | 5.9  | 0    | 7.7  | 5.3 | 11.6 | 0  |   |
| 4.2      | 1.4  | 1.7  | 1.2  | 1.1  | 1.9  | 1.5  | 1.4  | <i>CTC</i> | 1.1 | 1.4  | 0.3  | 1.4 | 5.4 | 1.3 | 0.1  | 2.9 | 3.3 | 0.2  | <i>CTC</i> | 0.7  | 1.3  | 0.6  | 0.3  | 0    | 0    | 0  | 0  | 3.4 | 0    | <i>CTC</i> | 1    | 0.9  | 0.6  | 1.3  | 5.9  | 0    | 0    | 2.6 | 0    | 0  |   |
| 10.9     | 0.7  | 0.8  | 0.8  | 0.9  | 1.6  | 1    | 0.7  | <i>CTA</i> | 0.9 | 0.5  | 0.2  | 1   | 2   | 1.9 | 0    | 2   | 1.6 | 3.9  | <i>CTA</i> | 0    | 1.1  | 0    | 0.1  | 6.9  | 0    | 0  | 5  | 1.2 | 5.1  | <i>CTA</i> | 0.2  | 0.1  | 0    | 0    | 0    | 0    | 0    | 0.7 | 5.8  | 0  |   |
| 2.7      | 6.1  | 5.7  | 5.2  | 5.2  | 6.6  | 6    | 5.6  | <i>CCT</i> | 6.1 | 5.1  | 2.7  | 6.6 | 8.2 | 7.8 | 0    | 4.3 | 4.3 | 18.1 | <i>CCT</i> | 3.5  | 2.8  | 0    | 5.5  | 6.9  | 57.1 | 0  | 5  | 5.2 | 11.9 | <i>CCT</i> | 2.2  | 2.5  | 0.9  | 5.1  | 5.9  | 17.6 | 7.7  | 2   | 11.6 | 0  |   |
| 0        | 5.4  | 6.1  | 3.6  | 2.7  | 1.9  | 3.1  | 3.7  | <i>CCG</i> | 7.3 | 5.1  | 4.7  | 4.8 | 1.7 | 5.1 | 0    | 1.6 | 1.5 | 0.1  | <i>CCG</i> | 4.9  | 7.1  | 4.1  | 5.5  | 3.4  | 14.3 | 0  | 5  | 4.3 | 1.7  | <i>CCG</i> | 10.4 | 9.3  | 11.5 | 7.6  | 0    | 17.6 | 0    | 2   | 0    | 0  |   |
| 0.1      | 4.7  | 5.1  | 3.6  | 3.4  | 4.8  | 5    | 4    | <i>CCC</i> | 4.8 | 4.2  | 2.3  | 0.5 | 2.9 | 3.7 | 0.1  | 2.6 | 1.8 | 0.2  | <i>CCC</i> | 10.5 | 5.7  | 2.3  | 0.1  | 6.9  | 0    | 0  | 5  | 0   | 1.7  | <i>CCC</i> | 4.3  | 3.1  | 0.3  | 0    | 0    | 0    | 15.4 | 0.7 | 0    | 0  |   |
| 0        | 3.4  | 3.3  | 2.9  | 2.6  | 5.3  | 3.3  | 4    | <i>CCA</i> | 5.3 | 2.8  | 9.1  | 9   | 4.2 | 6.2 | 23.1 | 3.7 | 4.7 | 0.2  | <i>CCA</i> | 1.4  | 2.4  | 6.4  | 9.4  | 3.4  | 0    | 0  | 5  | 4.3 | 0    | <i>CCA</i> | 2.1  | 1.4  | 3.5  | 7    | 0    | 5.9  | 7.7  | 3.3 | 0    | 0  |   |
| 1.8      | 1.3  | 1.3  | 3.1  | 3.6  | 2.1  | 2.4  | 1.6  | <i>ATT</i> | 0.6 | 1.7  | 0.6  | 5.5 | 2.2 | 0.7 | 5.3  | 4.3 | 3.1 | 0.2  | <i>ATT</i> | 0    | 1.2  | 0.6  | 6.6  | 0    | 0    | 0  | 0  | 0.6 | 0    | <i>ATT</i> | 0.5  | 1    | 0.6  | 8.9  | 0    | 0    | 0    | 3.3 | 0    | 0  |   |
| 2.2      | 1.1  | 0.8  | 1.4  | 1.5  | 0.8  | 1.5  | 1.6  | <i>ATG</i> | 1.5 | 1.5  | 0.7  | 1.4 | 3   | 1   | 30.5 | 3.6 | 4.4 | 0.2  | <i>ATG</i> | 0    | 1.7  | 0.6  | 0.3  | 6.9  | 0    | 0  | 0  | 4.9 | 0    | <i>ATG</i> | 0.2  | 0.4  | 0.3  | 0.3  | 5.9  | 0    | 0    | 4   | 0    | 50 |   |
| 2.6      | 0.9  | 0.7  | 1    | 1.1  | 0.5  | 1.2  | 1    | <i>ATC</i> | 0.4 | 1.4  | 0.4  | 1.1 | 2.9 | 0.6 | 4.8  | 3.2 | 3.2 | 0.1  | <i>ATC</i> | 0.7  | 1.6  | 0    | 0.1  | 0    | 0    | 50 | 0  | 4.3 | 0    | <i>ATC</i> | 1    | 1.5  | 0.6  | 0.3  | 5.9  | 0    | 0    | 4.6 | 0    | 0  |   |
| 4.3      | 0.8  | 0.7  | 1.6  | 2    | 1.1  | 1.5  | 1.1  | <i>ATA</i> | 0.7 | 1.2  | 0.4  | 0.7 | 1.7 | 2   | 2.6  | 2.2 | 3.5 | 0.2  | <i>ATA</i> | 0    | 1.1  | 0.6  | 0.1  | 0    | 0    | 0  | 0  | 3.4 | 1.7  | <i>ATA</i> | 0.2  | 0.2  | 0.6  | 0.6  | 0    | 0    | 0    | 5.3 | 0    | 50 |   |
| 1.2      | 1.9  | 1.8  | 2.5  | 2.6  | 3.7  | 2.3  | 2.3  | <i>ACT</i> | 1.5 | 2.2  | 1.1  | 1.3 | 3   | 0.9 | 0    | 3.7 | 4.1 | 5.1  | <i>ACT</i> | 0.7  | 1.1  | 0    | 0.3  | 3.4  | 0    | 0  | 0  | 4   | 10.2 | <i>ACT</i> | 0.2  | 0.5  | 0    | 0.3  | 0    | 0    | 0    | 2.6 | 2.9  | 0  |   |
| 0        | 3.5  | 3.1  | 3.3  | 3.1  | 2.1  | 2.8  | 3.7  | <i>ACG</i> | 6.1 | 4.5  | 3.5  | 0.9 | 1.9 | 3.4 | 0    | 1.1 | 1.2 | 3.7  | <i>ACG</i> | 3.5  | 5.6  | 6.4  | 0.5  | 6.9  | 0    | 0  | 0  | 0.9 | 1.7  | <i>ACG</i> | 7.6  | 7.9  | 11.5 | 0    | 0    | 5.9  | 0    | 2   | 7.2  | 0  |   |
| 0.1      | 2.5  | 2.3  | 2.2  | 1.9  | 3.2  | 2.3  | 2.4  | <i>ACC</i> | 1.6 | 2.5  | 1.4  | 5.5 | 2.2 | 1.7 | 0    | 2.9 | 2.5 | 17.9 | <i>ACC</i> | 1.4  | 2.9  | 0.6  | 10.1 | 0    | 0    | 0  | 0  | 2.8 | 16.9 | <i>ACC</i> | 0.7  | 1    | 0.3  | 6.6  | 0    | 11.8 | 7.7  | 3.3 | 21.7 | 0  |   |
| 0        | 1.9  | 1.7  | 2.4  | 2.5  | 2.4  | 2.3  | 2.4  | <i>ACA</i> | 1.7 | 2.1  | 2.6  | 1.6 | 3.4 | 2.6 | 4.2  | 3.8 | 5.1 | 1.7  | <i>ACA</i> | 0    | 1.7  | 2.9  | 0.5  | 0    | 0    | 50 | 0  | 3.1 | 1.7  | <i>ACA</i> | 0.2  | 0.5  | 0.9  | 0.9  | 5.9  | 0    | 0    | 6   | 1.4  | 0  |   |

Low  High
