# Supplementary figures and images for: Modeling and analysis of site-specific mutations in cancer identifies known plus putative novel hotspots and bias due to contextual sequences
Source: PubMed Central journal article supplement — Comput Struct Biotechnol J. 2020 Jun 20;18:1664–75. doi: 10.1016/j.csbj.2020.06.022 (PMC7339035; doi:10.1016/j.csbj.2020.06.022), 2020-06-20

Fitted  $F_k$  values in TCGA data

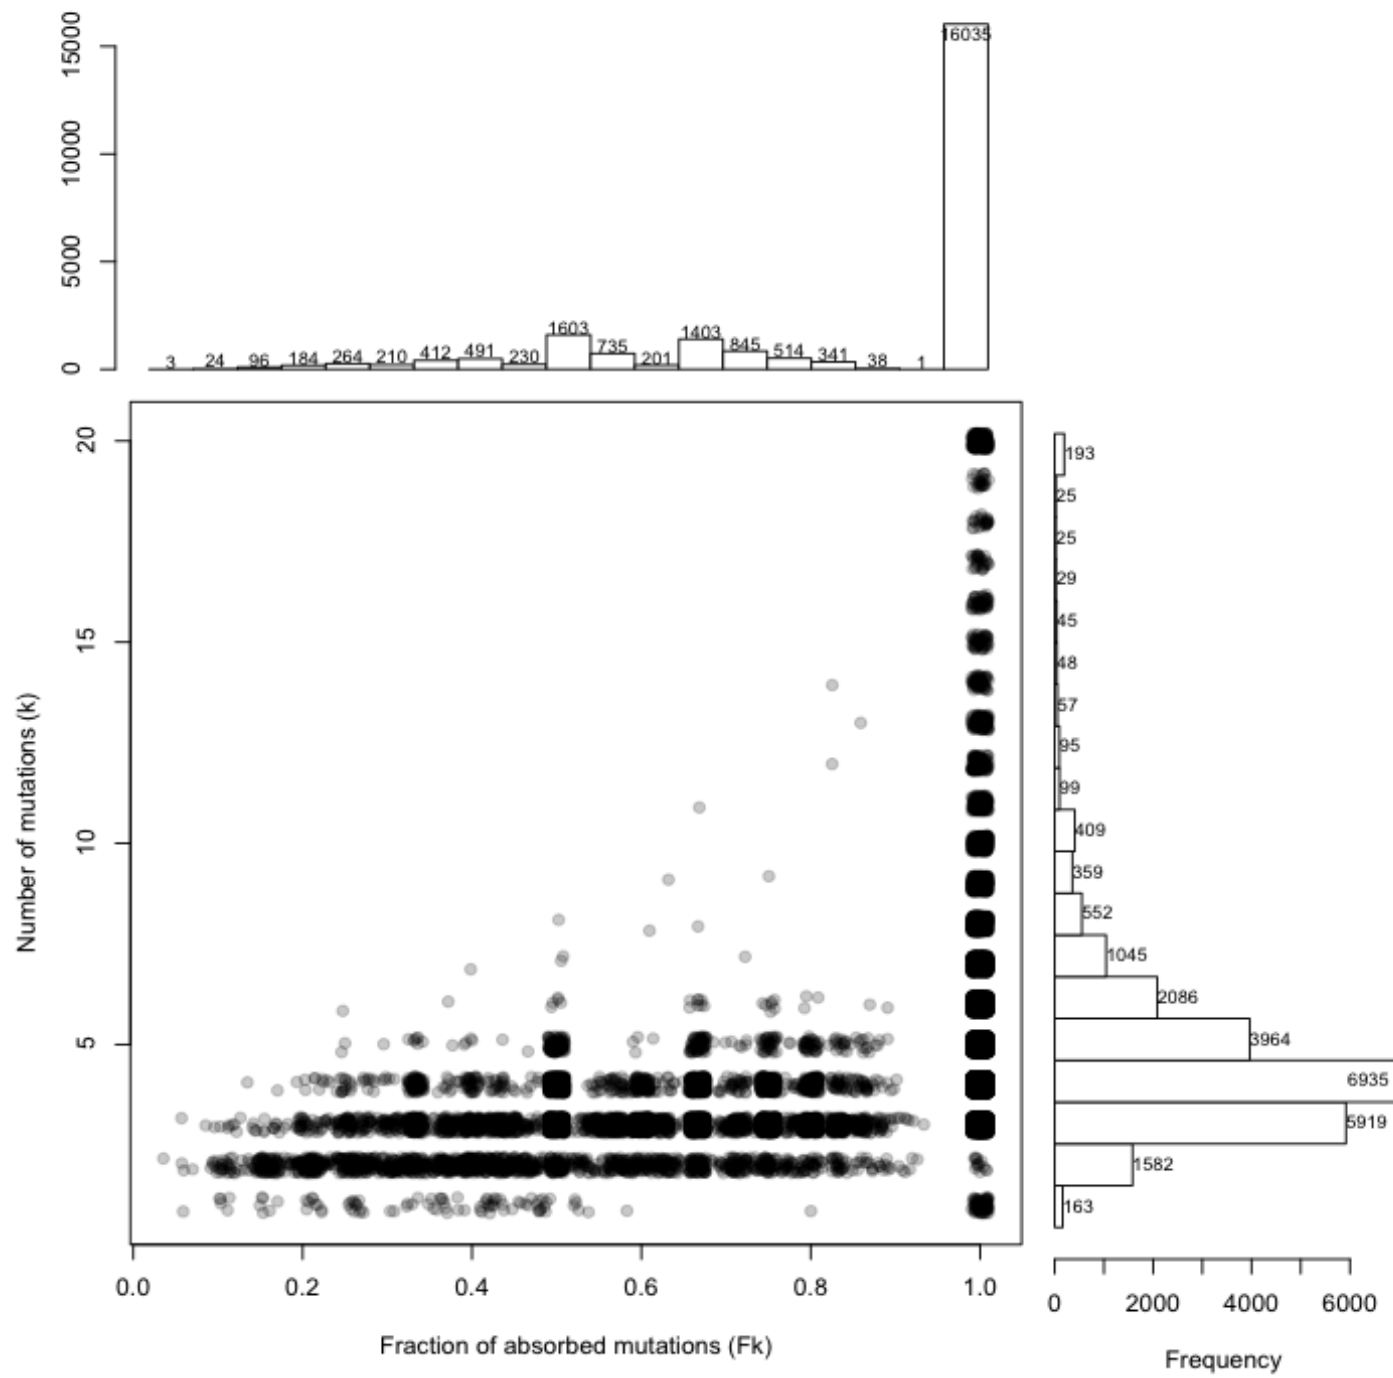

Supplement: mmc1.pdf [file mmc1.pdf]

**A**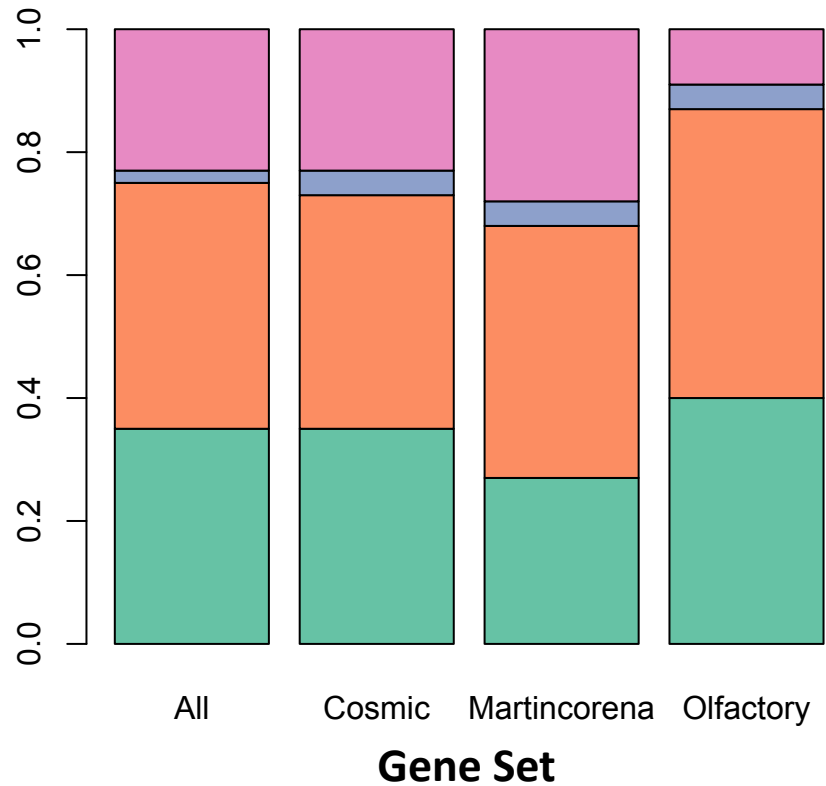**B**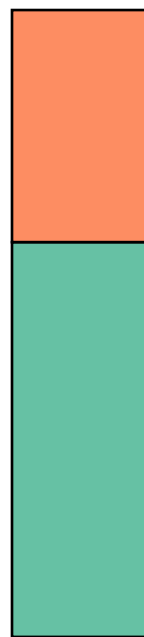**C**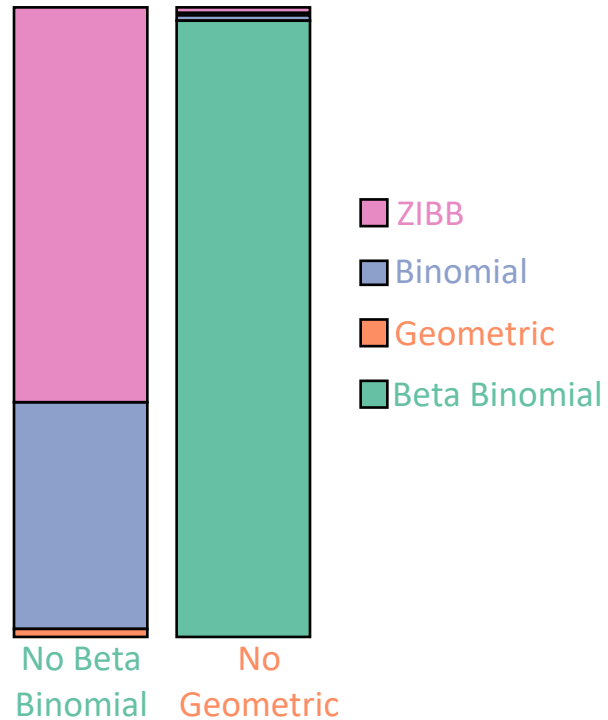

Supplement: mmc2.pdf [file mmc2.pdf]

n=

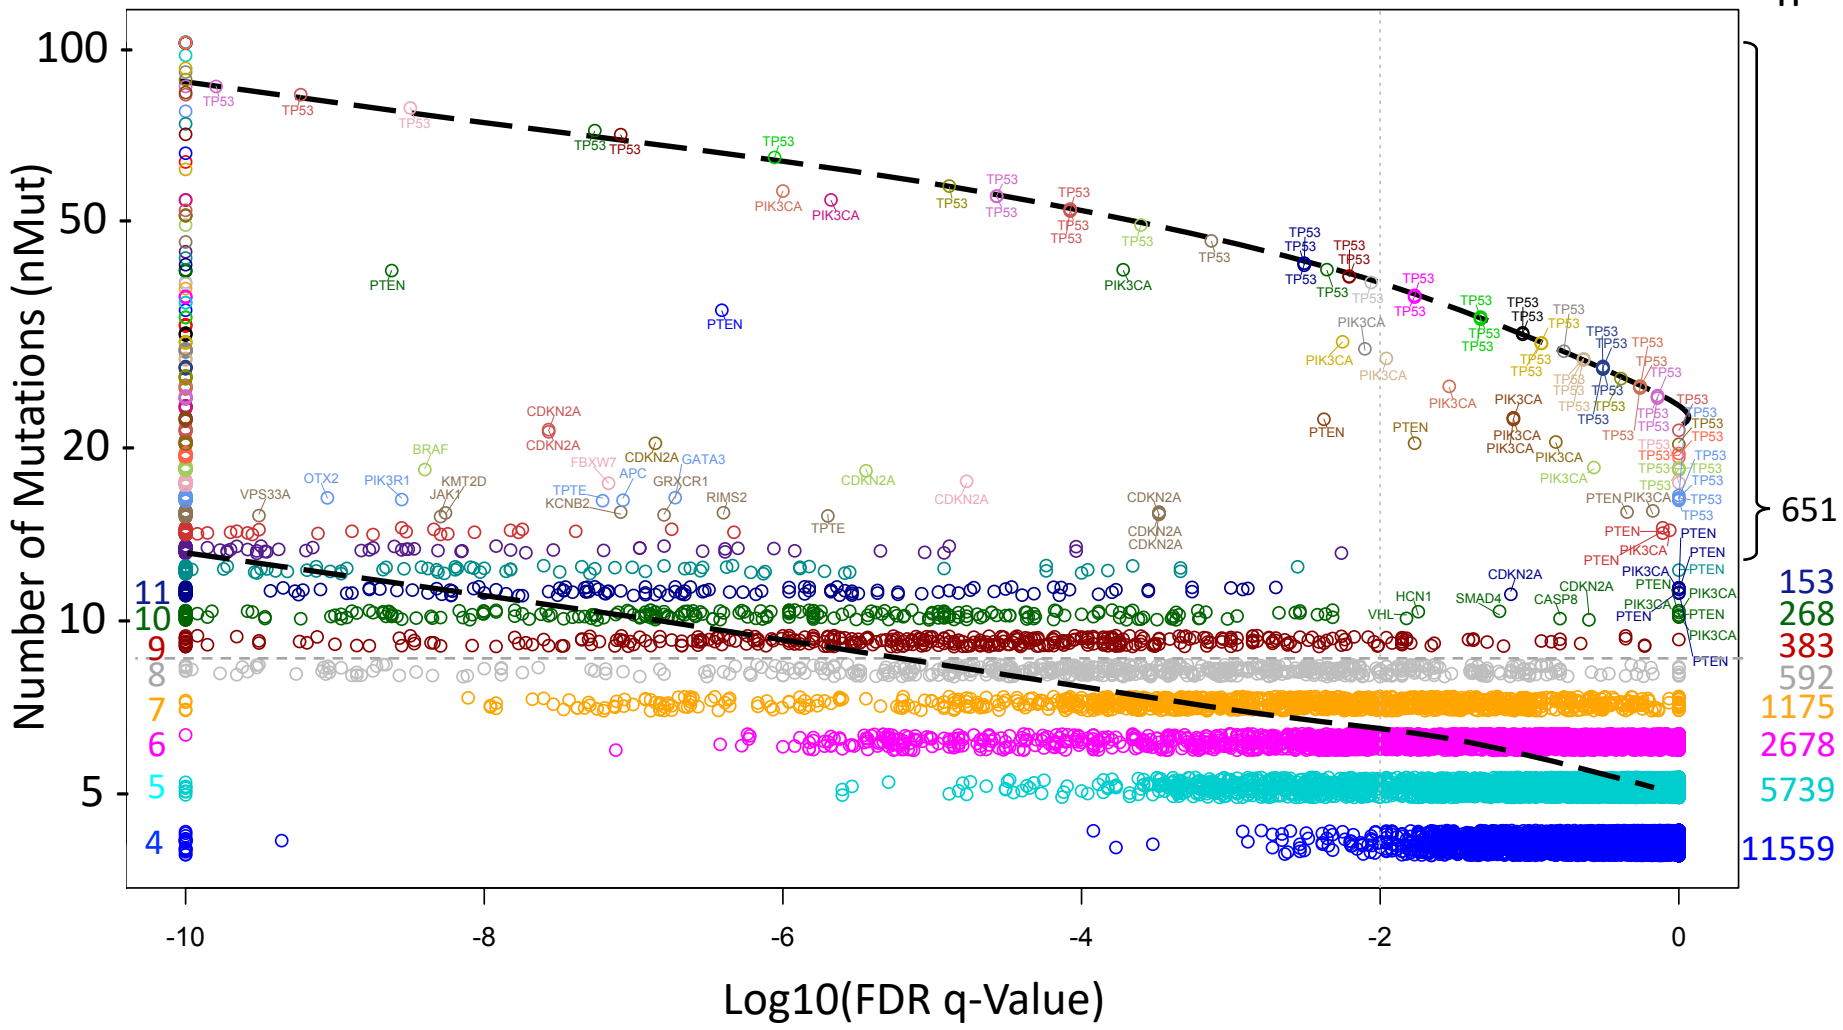

Supplement: mmc4.pdf [file mmc4.pdf]

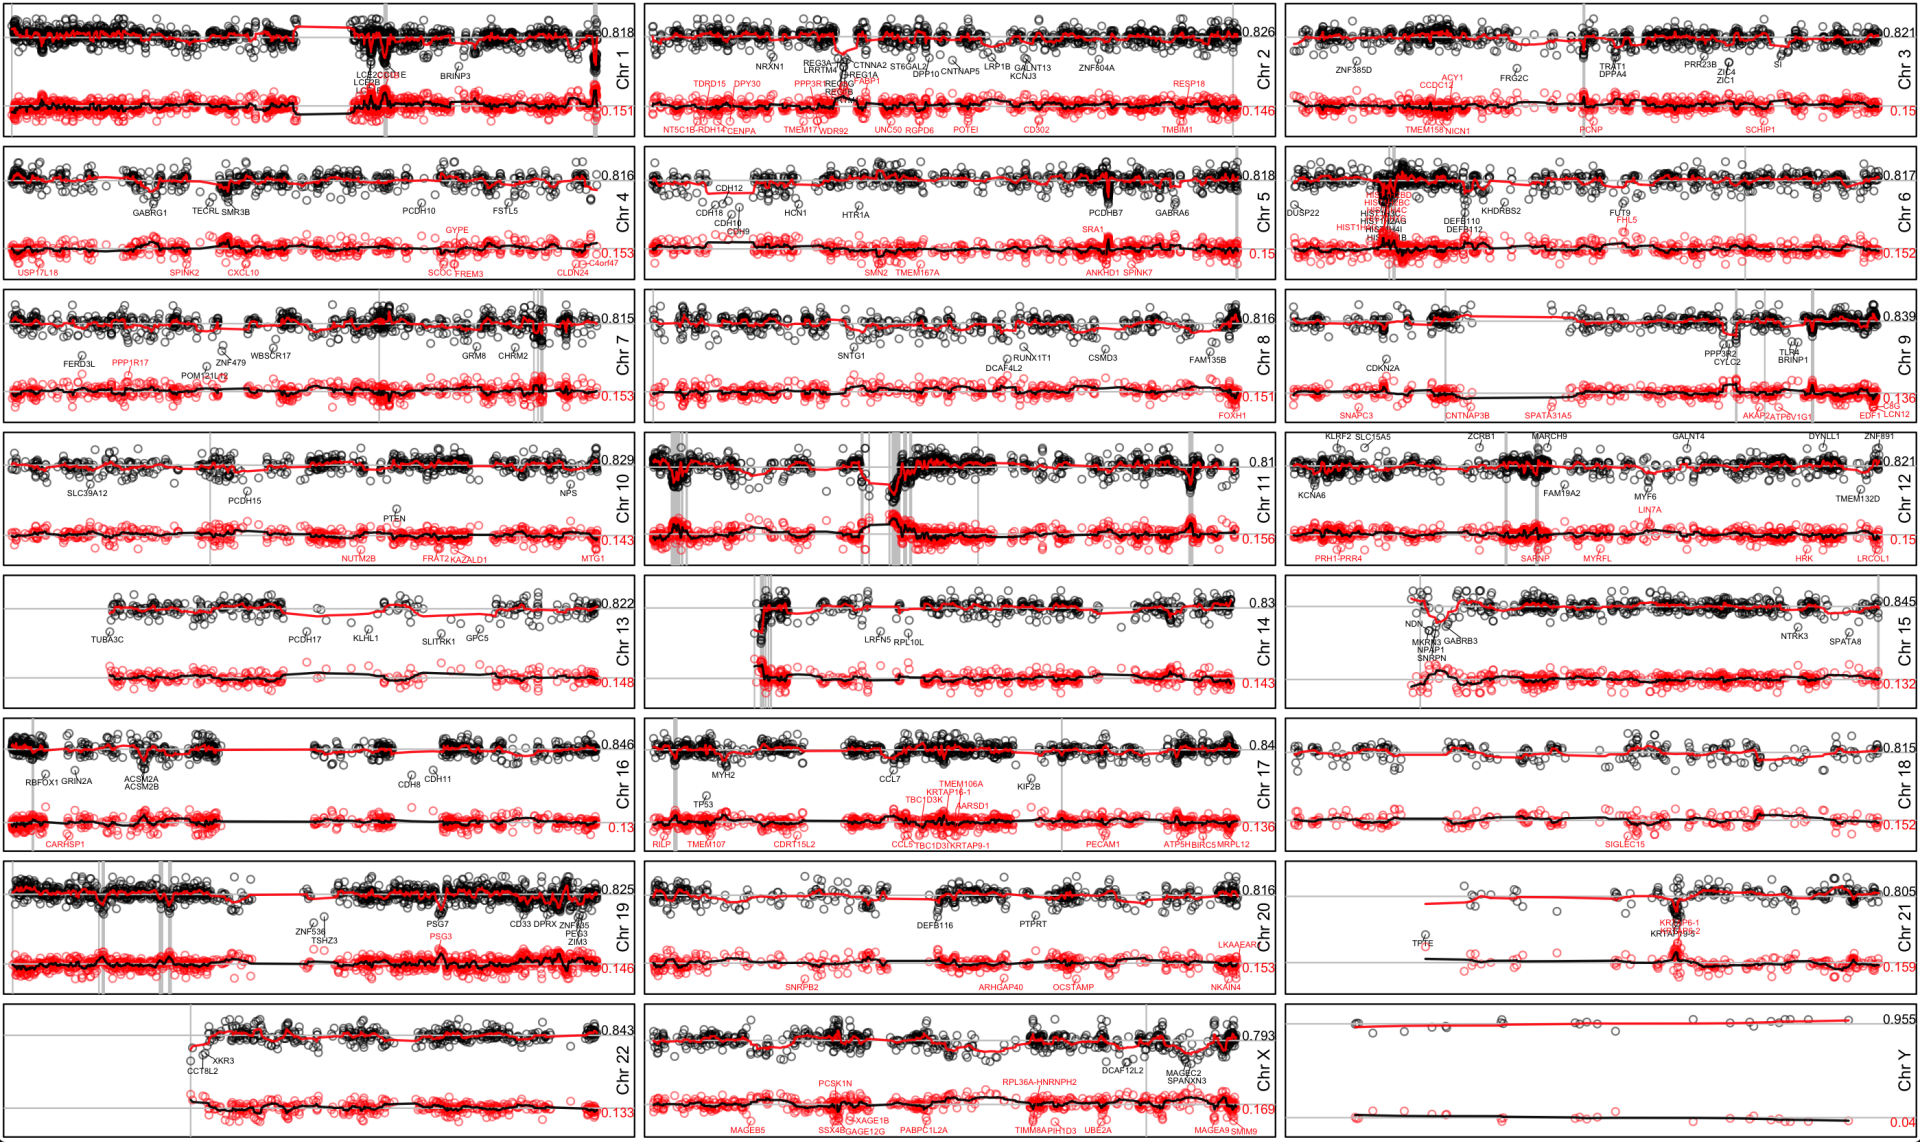

Supplement: mmc7.pdf [file mmc7.pdf]
